# Supplementary material
Source: PubMed Central journal article supplement (PMC10575651)
Supplement: Annexe_2_Simplified_Lipid_Summary_Handout.pdf [file Annexe_2_Simplified_Lipid_Summary_Handout.pdf]

# Patients en santé et prise en charge du cholestérol

Pour les personnes n'ayant pas subi de crise cardiaque ou d'AVC

Votre taux de cholestérol constitue l'un des nombreux facteurs de risque connus de crise cardiaque ou d'AVC. Parmi les autres, on trouve votre âge, votre sexe, le tabagisme, la tension artérielle et d'autres problèmes comme le diabète.

## À quelle fréquence devrais-je faire vérifier mon taux de cholestérol?

Les fournisseurs de soins avaient l'habitude de vérifier le taux de cholestérol chaque année. Ils s'en servent maintenant pour évaluer votre risque global de crise cardiaque ou d'AVC.

Comme votre taux de cholestérol change lentement, au rythme d'environ 1 % par année, il suffit de le vérifier tous les 5 à 10 ans. Si vous prenez un médicament appelé statine, vous n'avez pas besoin de le faire revérifier. Les statines aident à prévenir les crises cardiaques et les AVC peu importe votre taux de cholestérol.

## Quel est mon risque de crise cardiaque ou d'AVC?

Utilisez l'aide à la décision sur les risques cardiovasculaires (<https://decisionaid.ca/cvd/>) du groupe PEER et parlez à votre fournisseur de soins.

## Quelle est l'efficacité des statines?

Les statines sont susceptibles de réduire de 25 % votre risque de crise cardiaque et d'AVC. Par exemple, si votre risque de crise cardiaque ou d'AVC sur 10 ans est de 20 %, une statine peut le réduire à 15 %. Les statines sont les seuls médicaments contre le cholestérol qui peuvent diminuer votre risque de décès. Elles sont généralement bien tolérées. Certains patients signalent des douleurs musculaires, mais celles-ci surviennent aussi souvent avec un placebo (un comprimé sans médicament) qu'avec les statines.

Si vous avez des questions sur cette information, consultez l'aide à la décision sur les risques cardiovasculaires du groupe PEER ou parlez à votre fournisseur de soins.

## Que puis-je faire pour réduire mon risque?

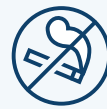

**Cesser de fumer :** C'est probablement la meilleure chose que vous puissiez faire pour votre santé. Si vous avez besoin d'aide, parlez à un fournisseur de soins.

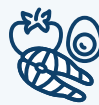

### Adopter un régime méditerranéen :

Ordinairement, ce régime prévoit beaucoup de légumes, de fruits, de poisson, de noix et d'huile d'olive\*.

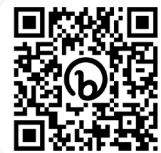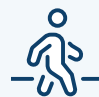

**Faites plus d'activité physique :** Trouvez une activité que vous aimez et à laquelle vous serez fidèle! Habituellement, une activité physique n'est pas meilleure que les autres.

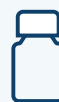

### Envisager la prise de médicaments :

Selon votre risque, votre fournisseur de soins pourrait suggérer une statine (p. ex., l'atorvastatine et la rosuvastatine).

\*URL d'un régime méditerranéen :

[www.diabete.qc.ca/wp-content/uploads/2023/04/DQ\\_pyramide\\_diete\\_Mediterranenne\\_web.pdf](http://www.diabete.qc.ca/wp-content/uploads/2023/04/DQ_pyramide_diete_Mediterranenne_web.pdf)

Les renseignements fournis dans ce feuillet se fondent sur des recommandations contenues dans la mise à jour de 2023 des Lignes directrices simplifiées sur les lipides.
