# Supplementary material
Source: PubMed Central journal article supplement (PMC10575651)
Supplement: Figure_1_Lignes_directrices_simplifiees_PEER_lipides_2023.pdf [file Figure_1_Lignes_directrices_simplifiees_PEER_lipides_2023.pdf]

# Lignes directrices simplifiées de PEER sur les lipides de 2023 : Résumé

Approche simplifiée

Prise de décision partagée

Réduction des tests inutiles

## Algorithme du traitement

(Exclut l'hypercholestérolémie familiale)

### Prévention primaire (aucune MCV antérieure)

Hommes de 40 à 75 ans  
Femmes de 50 à 75 ans **ou** Facteurs de risque irréfutables  
(p. ex. antécédents familiaux, diabète, tabagisme)

Calculer le risque cardiovasculaire du patient sur 10 ans\*

#### Risque <10 %

Encourager un mode de vie sain†.  
Suggérer une réestimation du risque cardiovasculaire dans 5 à 10 ans.

#### Risque de 10 à 19 %

Encourager un mode de vie sain†.  
Suggérer une discussion sur les statines (préférentiellement d'intensité modérée).

#### Risque ≥20 %

Encourager un mode de vie sain†.  
Suggérer une discussion sur les statines (préférentiellement d'intensité élevée).

\* Les taux de risque se fondent sur Framingham, le seul calculateur sur 10 ans validé au Canada.

† Le mode de vie sain inclut la cessation du tabagisme, l'activité physique et un régime méditerranéen.

EPA=acide eicosapentaénoïque; MCV=maladie cardiovasculaire; PCSK9=proprotéine convertase subtilisine-kexine de type 9.

### Intensité des statines

| Statine (mg)  | Faible | Modérée | Élevée |
|---------------|--------|---------|--------|
| Atorvastatine | 5      | 10-20   | 40-80  |
| Pravastatine  | 10-20  | 40-80   | -      |
| Rosuvastatine | 2,5    | 5-10    | 20-40  |
| Simvastatine  | 5-10   | 20-40   | -      |

### Statine amorcée?

**Non**

- Il est suggéré de réestimer le risque cardiovasculaire dans 5 à 10 ans ou plus tôt si les facteurs de risque changent.

**Oui**

- Ne pas répéter le profil lipidique.
- Ne pas mesurer la créatine kinase ni l'alanine aminotransférase au départ à moins que cela soit cliniquement indiqué.

En prévention secondaire, si une réduction additionnelle du risque cardiovasculaire est souhaitable en plus de la dose maximale de statine :

- Il est recommandé de discuter de l'ézétimibe et des inhibiteurs de la PCSK9.
  - En raison de ses effets indésirables, l'ester éthylique de l'EPA (icosapent) est suggéré, mais seulement après avoir envisagé l'ézétimibe ou un inhibiteur de la PCSK9.

## Bienfaits d'une thérapie aux statines

| Exemple de patient, risque de MCV sur 10 ans | Option de statine | Réduction du risque relatif | Réduction du risque absolu | Nouveau risque sur 10 ans avec traitement |
|----------------------------------------------|-------------------|-----------------------------|----------------------------|-------------------------------------------|
| 20 %                                         | Intensité modérée | 25 %                        | 5 %                        | 15 %                                      |
|                                              | Intensité élevée  | 35 %                        | 7 %                        | 13 %                                      |

## Agents hypolipémiants

| Médicament                                  | Éléments à prendre en compte dans les prescriptions                                                                                                                                                                                                                                                   | Réduction du risque relatif de MCV | Coût pour 90 jours <sup>1</sup> |
|---------------------------------------------|-------------------------------------------------------------------------------------------------------------------------------------------------------------------------------------------------------------------------------------------------------------------------------------------------------|------------------------------------|---------------------------------|
| <b>Statines</b>                             | <ul style="list-style-type: none"> <li>Le seul agent hypolipémiant qui réduit la mortalité toutes causes confondues.</li> <li>Symptômes musculaires durant la première année : 15 % contre 14 % avec le placebo</li> <li>N'aggrave pas la cognition ni la démence.</li> </ul>                         | 25-35 %                            | 30-50 \$                        |
| <b>Ézétimibe</b>                            | <ul style="list-style-type: none"> <li>Surtout étudié comme ajout aux statines en prévention secondaire.</li> <li>Bien toléré; 10 mg par jour.</li> </ul>                                                                                                                                             | 7 %                                | 30-45 \$                        |
| <b>Inhibiteurs de la PCSK9</b>              | <ul style="list-style-type: none"> <li>Surtout étudié comme ajout aux statines en prévention secondaire.</li> <li>Réactions au site d'injection : 3,5 % contre 2,1 % avec le placebo.</li> <li>Injections sous-cutanées toutes les 2 semaines : alirocumab 75-150 mg ou évolucumab 140 mg.</li> </ul> | ~15 %                              | 1500-2400 \$                    |
| <b>Fibrates</b>                             | <ul style="list-style-type: none"> <li>Augmente la créatinine sérique (2-11 % de plus que le placebo), la pancréatite (0,1 % de plus), altère les tests de la fonction hépatique (5 % de plus); exemple : fénofibrate.</li> </ul>                                                                     | 0-14 %*                            | 60-150 \$                       |
| <b>Ester éthylique de l'EPA (icosapent)</b> | <ul style="list-style-type: none"> <li>Surtout étudié comme ajout aux statines.</li> <li>Fibrillation auriculaire (5,3 % contre 3,9 % avec le placebo), saignements graves (2,7 % contre 2,1 % avec le placebo); 2 g 2 fois par jour.</li> </ul>                                                      | ~20 %                              | 1000 \$                         |

\* 0 % si ajouté aux statines; jusqu'à 14 % sans une statine

<sup>1</sup> Document sur les prix de PEER et du CMFA

EPA=acide eicosapentaénoïque; MCV=maladie cardiovasculaire;

PCSK9=proprotéine convertase subtilisine-kexine de type 9.

Sur 100 patients prenant des statines, 15 signalent des symptômes musculaires, mais 1 seul cas est dû aux statines

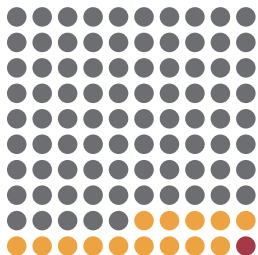

## Prise en charge des symptômes musculaires liés aux statines

Si un patient ne tolère pas une statine, discuter d'un nouvel essai de statine

## OPTIONS

Même statine, même dose

Dose ou intensité plus faible

Statine différente

Dose tous les 2 jours

Si un patient est incapable de les tolérer ou n'est pas réceptif à un nouvel essai

## Prévention primaire

Il est suggéré de ne pas suivre un traitement hypolipémiant autre qu'avec des statines

## Prévention secondaire

Il est suggéré de discuter de l'ézétimibe, des fibrates, des inhibiteurs de la PCSK9 ou de l'ester héthylique de l'EPA (icosapent)

## Foire aux questions et ressources utiles

## Q : Pourquoi les lignes directrices de PEER ne recommandent pas de cibler des seuils de LDL?

R : La vaste majorité des essais cliniques ont utilisé des doses fixes de statines en se fondant sur les risques de MCV. Les meilleures données probantes font valoir que les 2 stratégies (cibler des seuils de LDL ou utiliser des statines à des doses éprouvées) ont une efficacité semblable pour réduire le risque de MCV. Il est plus compliqué de cibler des seuils de cholestérol que d'utiliser des doses éprouvées. L'approche simplifiée d'utiliser des doses éprouvées réduit le fardeau des tests inutiles pour les patients et les professionnels de la santé. Plus de renseignements à ce sujet se trouvent dans les lignes directrices.

## Q : Quelle aide à la décision d'ordre cardiovasculaire devrais-je utiliser?

R : Il existe de nombreux calculateurs des risques cardiovasculaires. Le modèle de Framingham a été validé au Canada. [L'aide à la décision d'ordre cardiovasculaire de PEER](https://decisionaid.ca/cvd/) (<https://decisionaid.ca/cvd/>), fondé sur Framingham, a été produite pour ces lignes directrices.

## Q : Comment puis-je aider les patients à adopter un mode de vie sain?

R : Encouragez-les à cesser de fumer. Donnez-leur [une prescription d'exercice](#) et de l'information sur [le régime méditerranéen](#). (Exemples fournis à droite, en anglais)

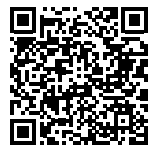

**PRESCRIPTION  
D'EXERCICE DE RXFILES**

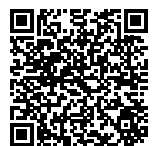

**RÉGIME  
MÉDITERRANÉEN**
